# Supplementary material for: Modulation of Bovine Bone Soup Stability: A Study on Demulsification Mechanisms and Hydrocolloid Interventions
Source: Research Square preprint supplement (doi:10.21203/rs.3.rs-6120671/v1), 2025-03-07
Supplement: Supplementary file 1 [file 4d49951c87c8287dd16c181c.docx]

**Highlights：**

- Clarify the cause of bovine bone soup demulsification during the storage process.
- Prolonged storage leads to the unfolding of protein denaturation structures and the weakening of intermolecular forces in bovine bone soup.
- Orthogonal tests were performed to obtain the optimal use of hydrocolloids in bovine bone soup.
- The addition of hydrocolloids significantly improved the storage stability of bovine bone soup under different temperature conditions.
