# Supplementary material for: Modulation of Bovine Bone Soup Stability: A Study on Demulsification Mechanisms and Hydrocolloid Interventions
Source: Research Square preprint supplement (doi:10.21203/rs.3.rs-6120671/v1), 2025-03-07
Supplement: Supplementary file 2 [file f90ccb39957c1aa1ded32dd3.docx]

Graphical Abstract
